# Supplementary material for: Ulipristal Acetate for Treatment of Premenstrual Dysphoric Disorder: A Proof-of-Concept Randomized Controlled Trial
Source: Atypon-hosted journal article supplement (doi:10.1176/appi.ajp.2020.20030286), 2020-12-10
Supplement: appi.ajp.2020.20030286.ds001.pdf [file appi.ajp.2020.20030286.ds001.pdf]

Figure S1. Study flowchart

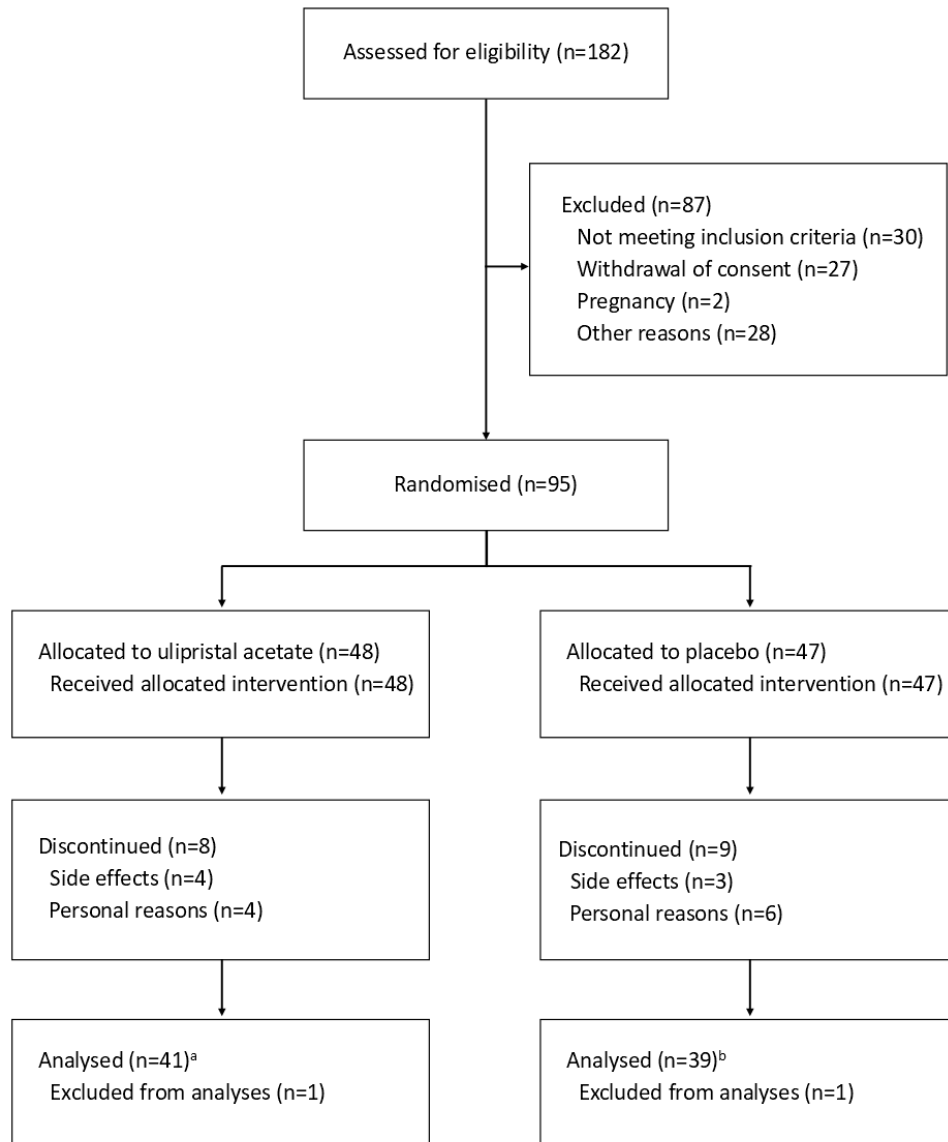

<sup>a</sup>Including one woman with data from cycle 2

<sup>b</sup>Including one woman with data from cycle 2

**TABLE S1. The most commonly reported side effects. Data presented as n (%)**

|                           | UPA N=48             | Placebo N=47 |
|---------------------------|----------------------|--------------|
| Headache                  | 4 (8.3)              | 2 (4.3)      |
| Nausea                    | 4 (8.3) <sup>a</sup> | 0            |
| Fatigue                   | 3 (6.3)              | 2 (4.3)      |
| Gastrointestinal problems | 1 (2.1)              | 3 (6.4)      |
| Depressive symptoms       | 1 (2.1)              | 2 (4.3)      |
| Malaise                   | 1 (2.1)              | 1 (2.1)      |
| Anxiety                   | 0                    | 2 (4.3)      |

<sup>a</sup> Significantly different from placebo, chi-square test,  $p < 0.05$ .
